# Supplementary material
Source: publisher figshare collection journal article supplement (https://diabetesjournals.figshare.com/ndownloader/files/26750075)
Supplement: Supplementary file 1 [file 26750075]

**Forbes et al Supplementary Appendix; “T cell expression and release of kidney injury molecule-1 in response to glucose variations initiates kidney injury in early diabetes”:**

| Parameters                                           | Control Healthy Tissue                         | Minimal Change Disease                         | 1° FSGS                                        | Diabetic Kidney Disease |
|------------------------------------------------------|------------------------------------------------|------------------------------------------------|------------------------------------------------|-------------------------|
| Age (years)                                          | 50.3±22.4                                      | 23.3±5.9                                       | 54.5±20.3                                      | 51.5±17.9               |
| Sex N, (% female)                                    | 4 (0)                                          | 4 (25)                                         | 4 (50)                                         | 4 (25)                  |
| BMI (kg/m <sup>2</sup> )                             | N/A                                            | N/A                                            | N/A                                            | N/A                     |
| Random BG (mmol/L)                                   | 6.4±1.2                                        | 5.1±1.0                                        | 6.4±2.2                                        | 9.6±0.4                 |
| Diabetes Duration (years)                            | 0                                              | No Family History                              | No Family History                              | 11.8±6.7                |
| HbA <sub>1C</sub> (%;mmol/mol)                       | No record (available for one of four patients) | No record                                      | No record (available for one of four patients) | 8.7±4.0                 |
| SBP (mmHg)                                           | No record                                      | 132.5±12.6                                     | 138.8±13.1                                     | 142.5±8.7               |
| Total Chol (mmol/L)                                  | No record (available for one of four patients) | No record (available for two of four patients) | 5.1±0.4                                        | 5.4±1.1                 |
| eGFR <sub>CKD EPI</sub> (ml/min/1.73m <sup>2</sup> ) | 76.5±10.7                                      | 85.8±8.5                                       | 36.8±19.8                                      | 27.5±16.7               |
| uPCR (g/mol)                                         | No record (available for one of four patients) | 686.3±640.3                                    | 244.3±171.7                                    | 684.8±491.5             |

**Suppl. Table S1. – Demographic and clinical characteristics of human kidney tissue donors.** Control kidney tissue was obtained following Nephrectomy. Minimal Change Disease – immunofluorescence negative; IF/TA negative. Diabetic kidney disease – confirmed by the presence of Kimmelstiel-Wilson nodules, mesangial matrix expansion, immunofluorescence positive, IF/TA positivity. Focal Sclerosing Glomerulosclerosis (FSGS) – phenotypically not secondary FSGS; immunofluorescence negative; IF/TA positive. Minimal Change Disease – immunofluorescence negative; IF/TA negative. uPCR - urinary protein excretion/mol of creatinine. Data presented are Mean±SD.

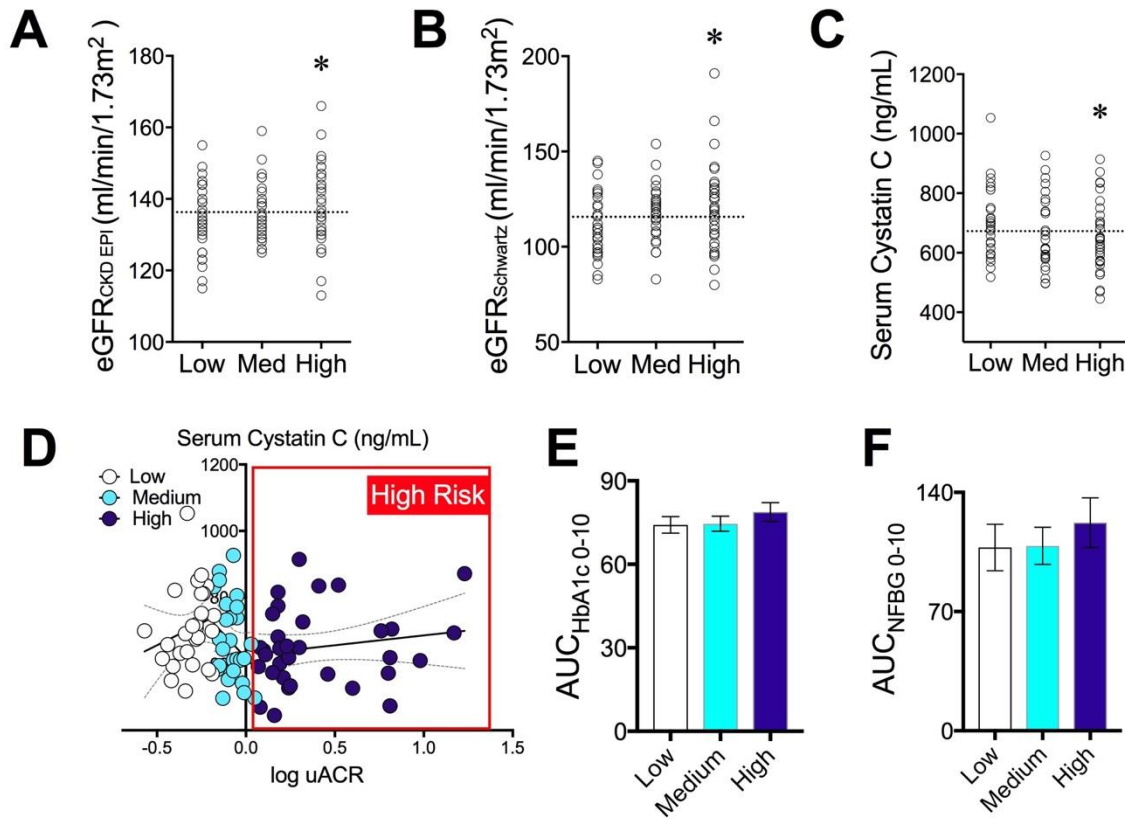

**Suppl. Fig. S1. Kidney function data in youth with varied risk for DKD.** Youth ( $20.0 \pm 2.8$  yrs old) with type 1 diabetes were stratified by risk for DKD using tertiles of urinary albumin:creatinine ratio (uACR; Low Risk,  $N=33$ ; Medium Risk,  $N=33$ ; High Risk,  $N=34$ ). **A-C** Renal functional data plots of estimated glomerular filtration rate (eGFR) with the population mean shown as a dotted line using (A) the adult CKD-EPI equation; (B) the pediatric modified Schwartz equation; (C) the surrogate inverse marker serum cystatin C. (D) General linear regression plot of log uACR vs serum cystatin C corrected for age, sex, diabetes duration and HbA<sub>1c</sub>. **E-F** Area under the curve (0-10 years) for historical (E) long term glucose control by HbA<sub>1c</sub>; and (F) Random blood glucose concentrations (NFBG). \* $P < 0.05$ ; \*\* $P < 0.01$  vs low risk group.

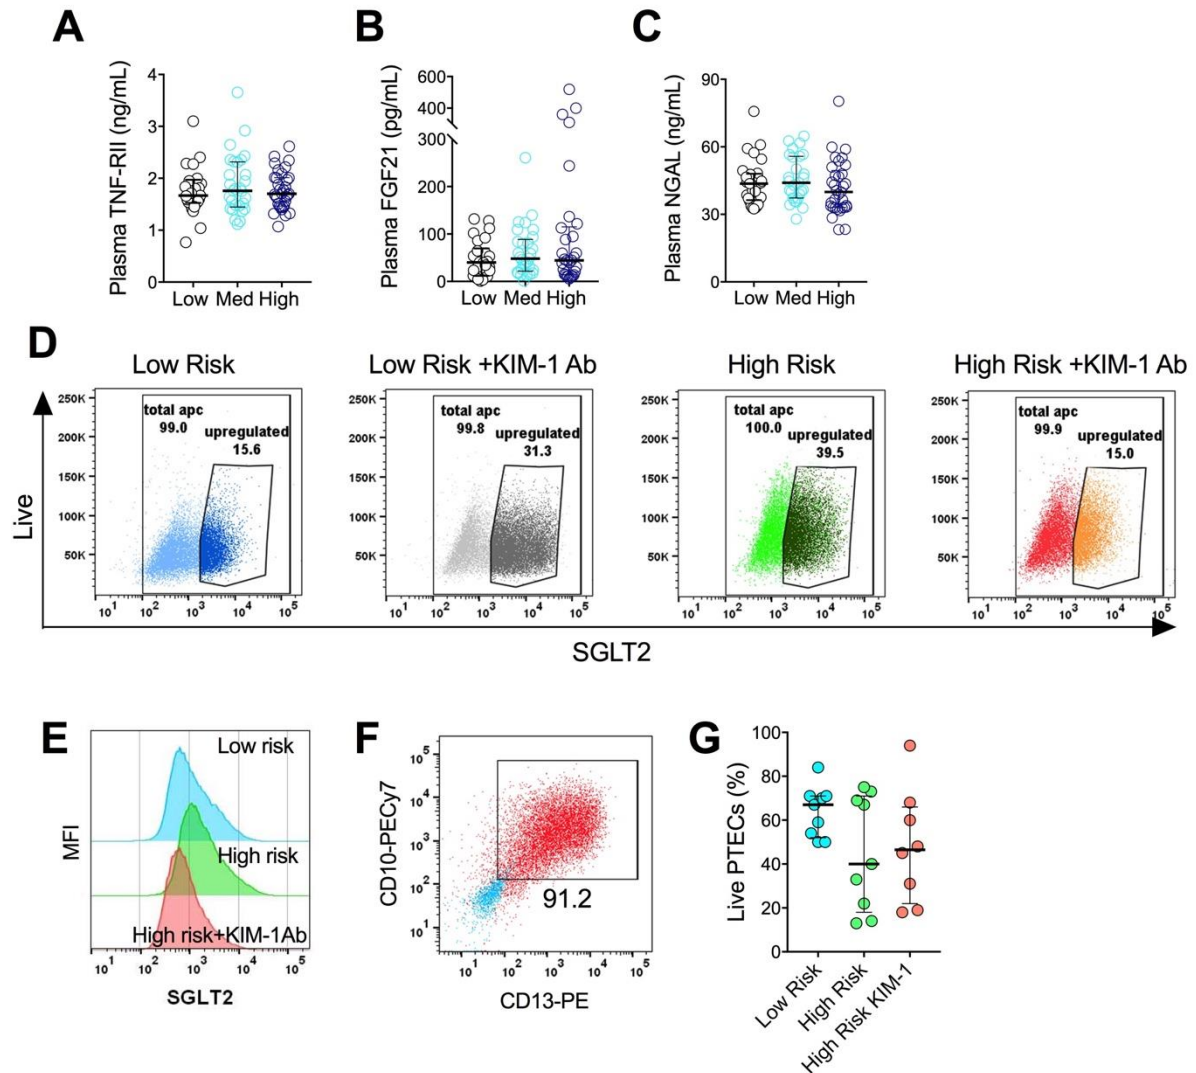

**Suppl. Fig. S2. Biomarkers of kidney injury and proximal tubule cells exposed to plasma from youth at risk for DKD.** Youth ( $20.0 \pm 2.8$  yrs old) with type 1 diabetes were stratified by risk for DKD using tertiles of urinary albumin:creatinine ratio (uACR; Low Risk ,  $N=33$ ; Medium Risk,  $N=33$ ; High Risk,  $N=34$ ). **A-C** Plasma biomarkers were measured by ELISA (**A**) tumor necrosis factor receptor -2 (TNF-RII); (**B**) fibroblast growth factor -21 (FGF-21) and (**C**) Neutrophil gelatinase-associated lipocalin (NGAL) in all youth within the cohort. **D-G** Human healthy primary proximal tubule epithelial cells (PTEC) were exposed to plasma (4%) from youth with varied risk for DKD for 24 hours in the presence and absence of KIM-1 blockade (Ab). (**D**) Representative Flow cytometry dot plots of shift in SGLT2-APC expression in PTEC following exposure to 4% patient plasma. (**E**) Representative flow cytometry dot plot characterizing live kidney cells as human PTEC by dual expression of CD10 and CD13 after exposure to patient plasma; (**F**) Proportion of live PTEC after 24 hours exposure to plasma; (**G**) Flow cytometry histograms of SGLT2 expression in live PTECs at 24 hours (blue-Low Risk; green-High Risk+Control Ab; red -High Risk+KIM-1 blocking Ab).

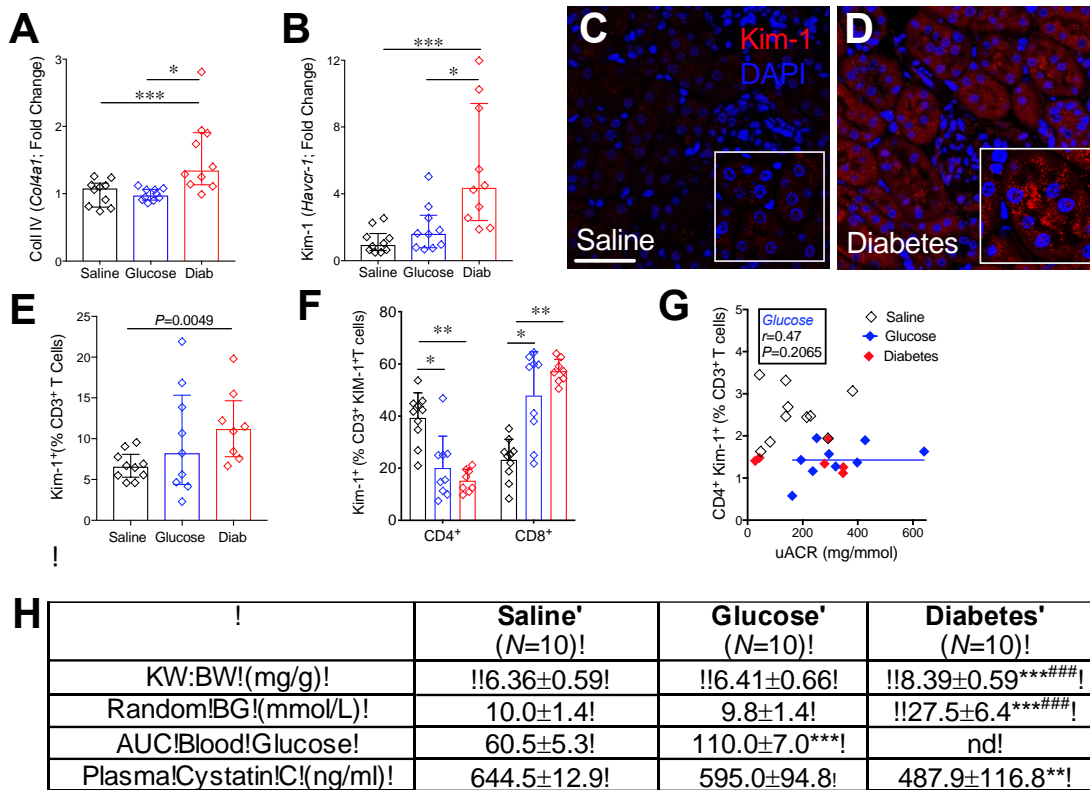

**Suppl. Fig. 3. Glucose variability even in the absence of diabetes increases T cell Kim-1 expression in preclinical models.** Male adolescent apolipoprotein E deficient mice (*ApoE*<sup>-/-</sup>; 6 weeks of age) received four intraperitoneal (i.p.) injections of glucose (2g/kg; blue diamond symbols; N=10) or isovolumetric saline injections (saline; white diamonds; N=10), delivered two hours apart, to achieve plasma glucose variations which peaked between ~15-20mmol/L. **A-B** Kidney cortical gene expression by qPCR of (A) Collagen IV (*Col4a1*) or (B) Kim-1 (*Havcr1*). **C-D** Representative photomicrographs of kidney cortical Kim-1 (red) and nuclear (DAPI, blue) immunofluorescence in (C) saline injected or (D) diabetic mice. Scale Bar = 50 µm; x200 Magnification. **E-G** Flow cytometry analysis of live peripheral blood Kim-1 positive (Kim-1<sup>+</sup>) (E) T cells (Kim-1<sup>+</sup>CD3<sup>+</sup>); (F) CD4<sup>+</sup> (Kim-1<sup>+</sup>CD3<sup>+</sup>CD4<sup>+</sup>CD8<sup>-</sup>) and CD8<sup>+</sup> (Kim-1<sup>+</sup>CD3<sup>+</sup>CD8<sup>+</sup>CD4<sup>-</sup>) T cells as proportion of CD3<sup>+</sup>KIM-1<sup>+</sup> T cells. Linear regression of (G) CD4<sup>+</sup>CD8<sup>-</sup>Kim-1<sup>+</sup>; (H) Characteristics of *ApoE*<sup>-/-</sup> murine groups at the study end. Data are shown as mean SD or median (IQR) and tested using 1 way ANOVA/Tukey's post-hoc or Kruskal Wallis/Dunn's post-hoc testing. \**P*<0.05; \*\**P*<0.01, \*\*\**P*<0.001 vs saline group, ###*P*<0.001 vs glucose group.

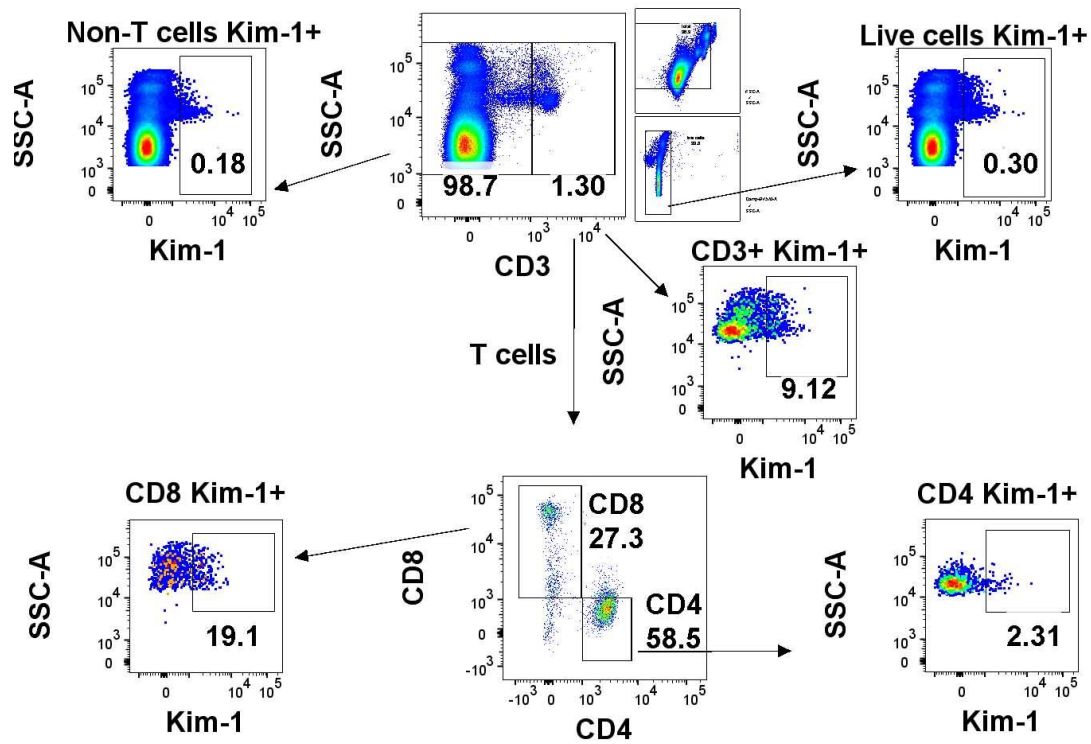

**Suppl. Fig. S4. Gating strategy for KIM-1+ Peripheral Blood Mononuclear Cells in *ApoE*<sup>-/-</sup> mice at risk for DKD.**

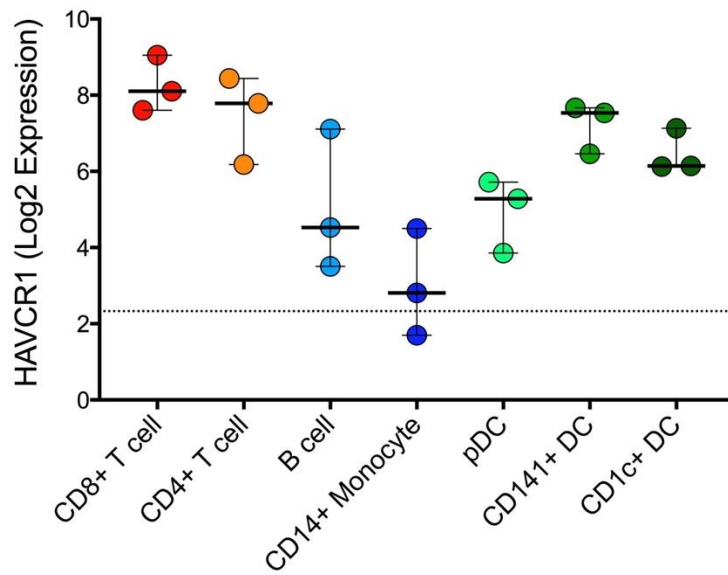

**Suppl. Fig. S5. Peripheral blood mononuclear cell expression of *HAVCR1* (KIM-1 gene) in healthy human donors.** Expression data was obtained from the gene expression omnibus (GEO) dataset GSE77671. Data were processed for background correction, normalization and log2-transformation within R and integrated into the Stemformatics platform [www.stemformatics.org] for visualization.  $N=30$  donations from peripheral blood. The probe shown for *HAVCR1* is A\_23\_P347610.

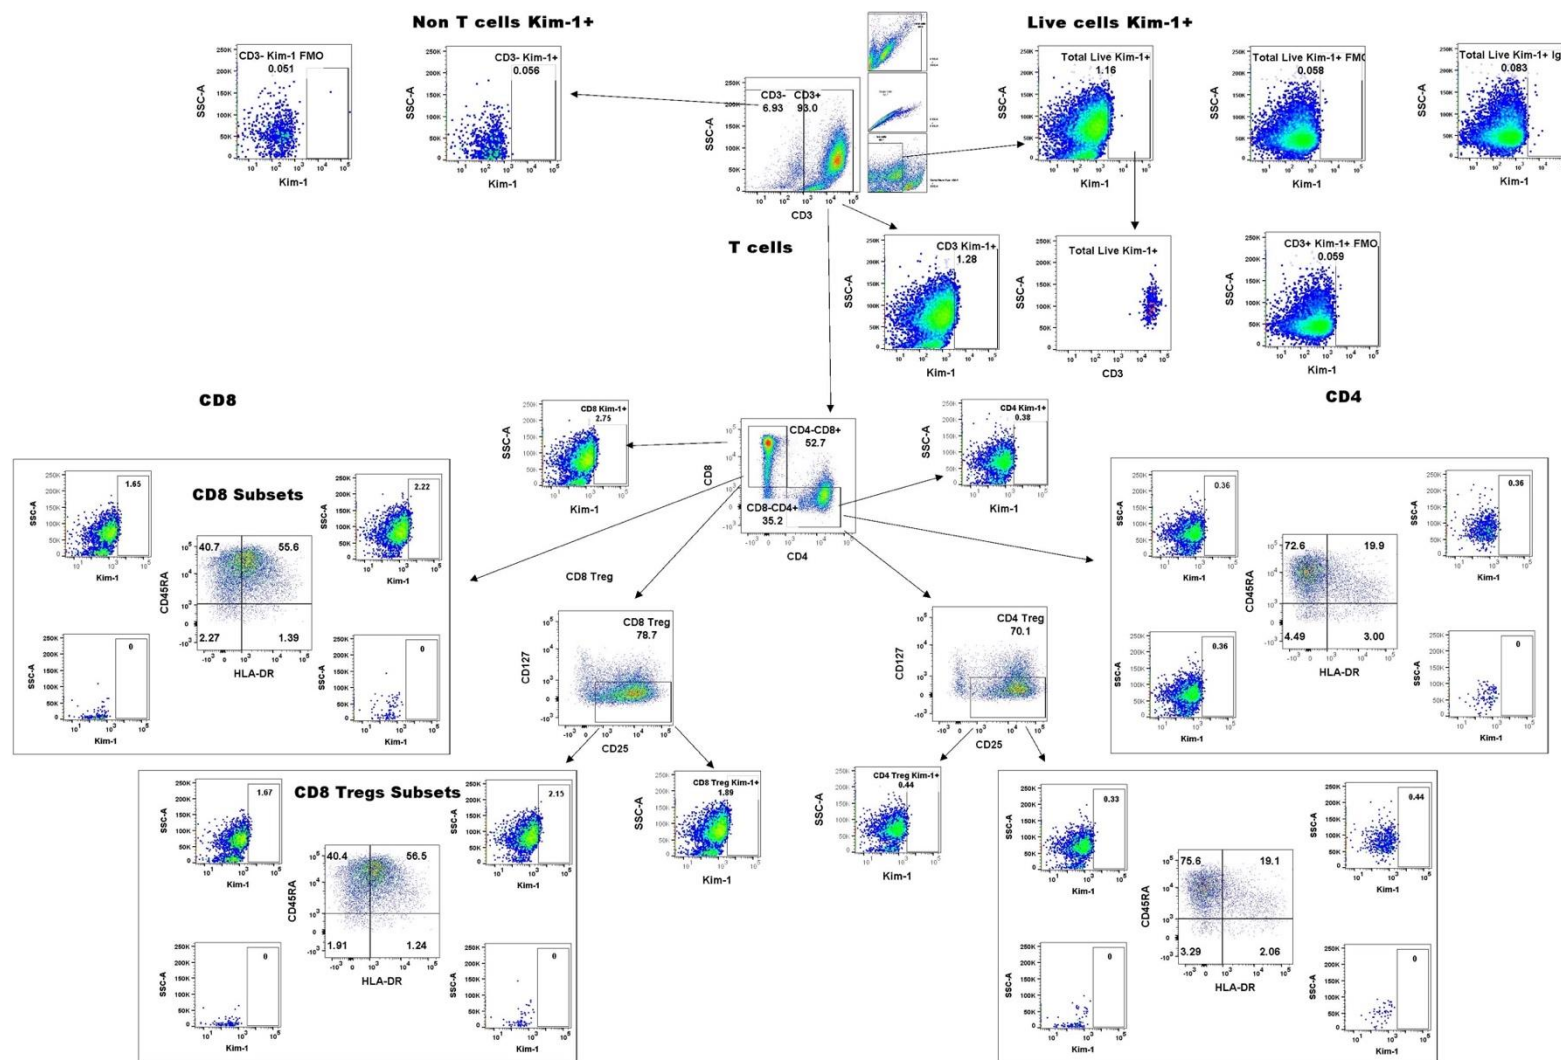

Suppl. Fig. S6. Gating strategy for Peripheral Blood Mononuclear Cells in youth at risk for DKD.



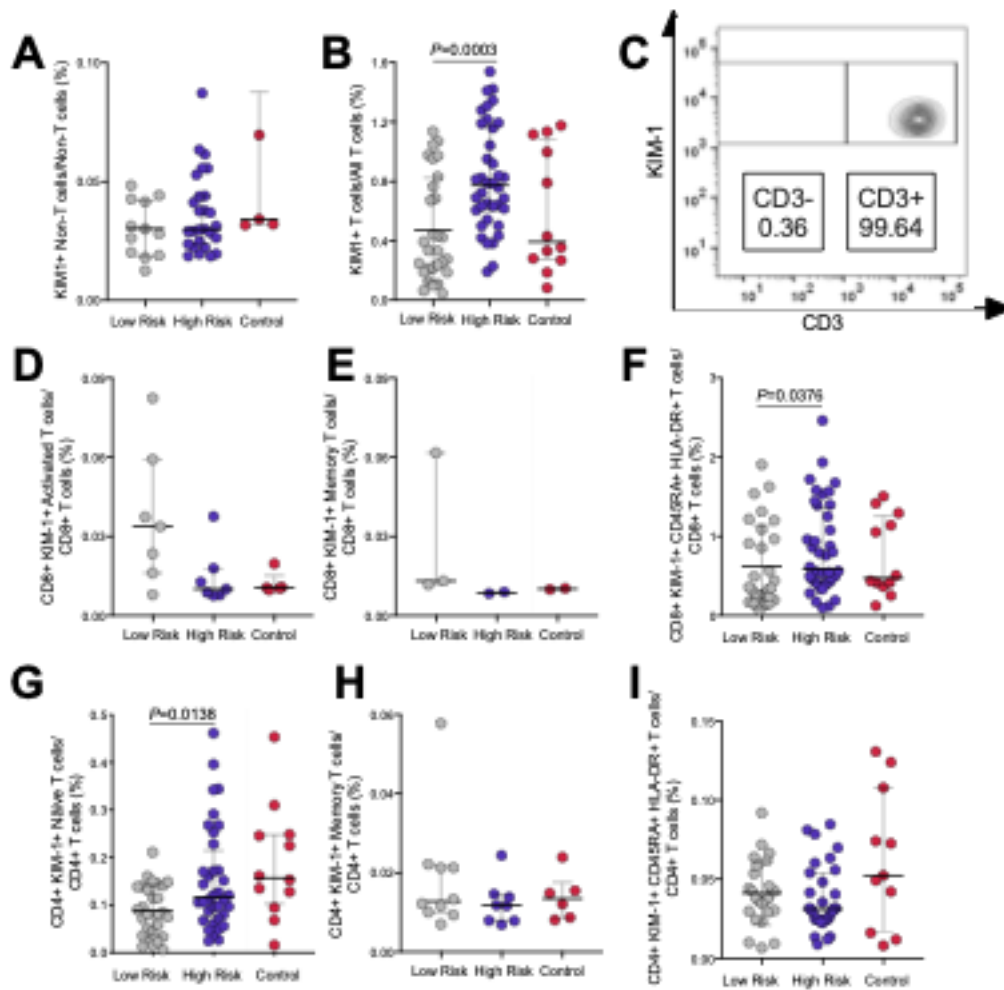

**Suppl. Fig. S7. T conventional cell subset KIM-1 expression in youth at high risk for DKD.** Youth ( $20.0 \pm 2.8$  yrs old) with type 1 diabetes were stratified by risk for DKD using tertiles of urinary albumin:creatinine ratio (uACR; Low Risk ,  $N=33$ ; Medium Risk,  $N=33$ ; High Risk,  $N=34$ ). KIM-1 expression on live peripheral blood mononuclear cells (PBMCs) is shown for low and high risk groups. Circulating PBMC proportions of live KIM-1+ (A) CD3<sup>-</sup> KIM-1+ non-T cells and (B) CD3<sup>+</sup>KIM-1+ T cells. (C) Live KIM-1+ PBMC shown as a contour diagram. Live CD3<sup>+</sup> T cells expressing CD4<sup>+</sup> and CD8<sup>+</sup> were sorted into specific subsets of (D) CD8<sup>+</sup> activated T<sub>conv</sub> (CD3<sup>+</sup>CD8<sup>+</sup>CD4<sup>+</sup>CD45RA<sup>-</sup>HLA-DR<sup>+</sup>); (E) CD8<sup>+</sup> Memory T<sub>conv</sub> (CD3<sup>+</sup>CD8<sup>+</sup>CD4<sup>+</sup>CD45RA<sup>+</sup>HLA-DR<sup>-</sup>); (F) CD3<sup>+</sup>CD8<sup>+</sup>CD4<sup>+</sup>CD45RA<sup>+</sup>HLA-DR<sup>+</sup> T<sub>conv</sub> double positive cells; (G) CD4<sup>+</sup> naïve T<sub>conv</sub> (KIM-1<sup>+</sup>CD3<sup>+</sup>CD4<sup>+</sup>CD8<sup>-</sup>CD45RA<sup>-</sup>HLA-DR<sup>-</sup>) T cells; (H) CD4<sup>+</sup> Memory T<sub>conv</sub> (CD3<sup>+</sup>CD4<sup>+</sup>CD8<sup>-</sup>CD45RA<sup>+</sup>HLA-DR<sup>-</sup>); or (I) CD3<sup>+</sup>CD4<sup>+</sup>CD8<sup>-</sup>CD45RA<sup>+</sup>HLA-DR<sup>+</sup> T<sub>conv</sub> double positive cells. KIM-1<sup>+</sup>CD4<sup>+</sup> activated T<sub>conv</sub> (KIM-1<sup>+</sup>CD3<sup>+</sup>CD4<sup>+</sup>CD8<sup>-</sup>CD45RA<sup>+</sup>HLA-DR<sup>+</sup>) T cells are not shown as they were present in negligible quantities; Data are shown as mean $\pm$ SD or median (IQR) and tested using Student's T test or Mann Whitney U testing.



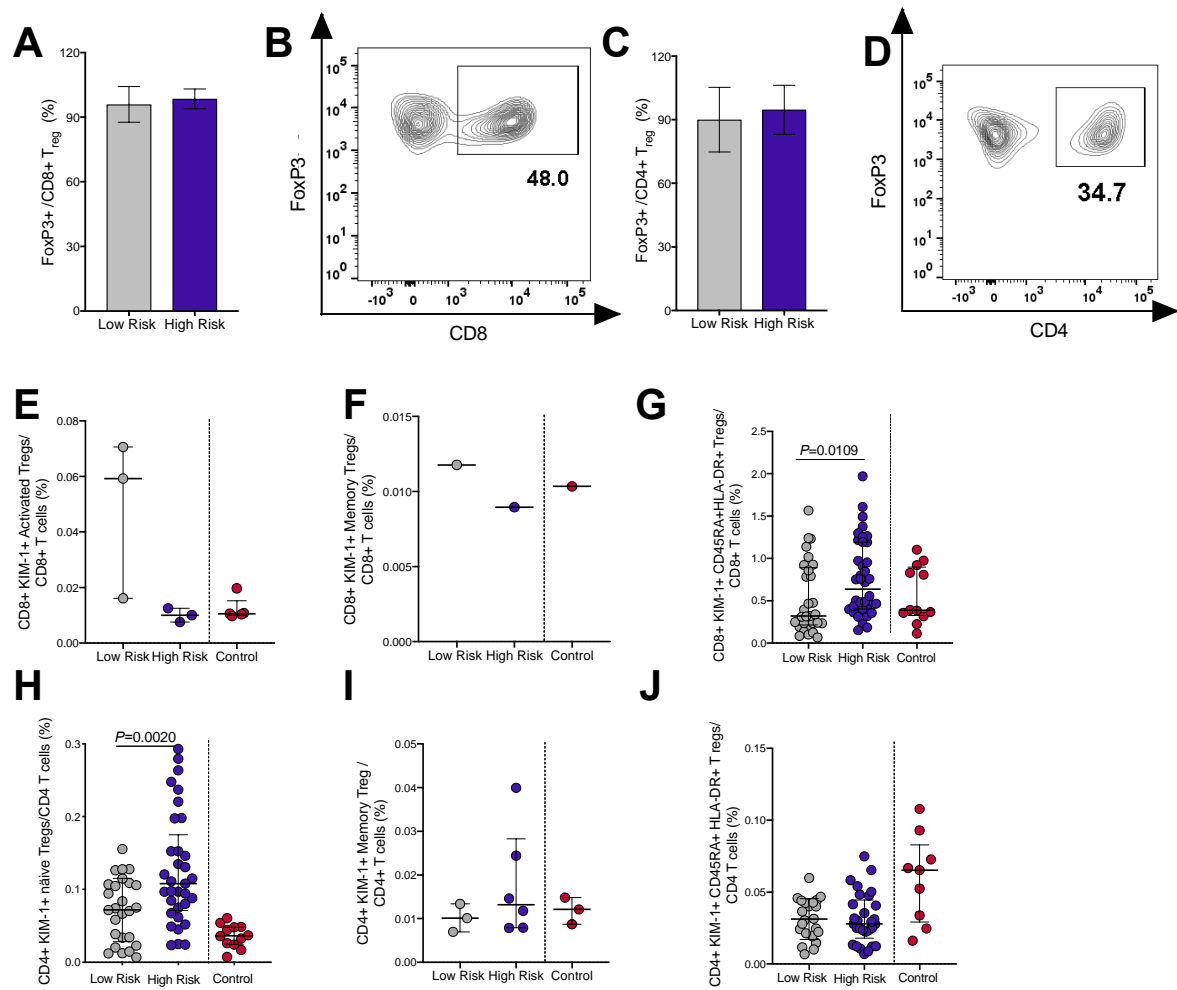

**Suppl. Fig. S8. T regulatory cell subset KIM-1 expression in youth at high risk for DKD.** Youth ( $20.0 \pm 2.8$  yrs old) with type 1 diabetes were stratified by risk for DKD using tertiles of urinary albumin:creatinine ratio (uACR; Low Risk,  $N=33$ ; Medium Risk,  $N=33$ ; High Risk,  $N=34$ ). KIM-1 expression on live peripheral blood mononuclear cells (PBMCs) is shown for low and high risk groups. **A-D** FOXP3 expression in **(A)** CD8+ T regulatory cells (T<sub>reg</sub>); **(B)** CD8+ T<sub>reg</sub> as a Contour plot; **(C)** CD4+ T<sub>reg</sub> and **(D)** as a Contour plot in CD4+ T<sub>reg</sub> cells. Circulating live CD3+KIM-1+ T<sub>reg</sub> expressing CD4+ and CD8+ were sorted into specific subsets of **(E)** CD8+ activated T<sub>reg</sub> (CD3+CD8+CD4<sup>-</sup>CD25+CD127<sup>lo/-</sup>CD45RA<sup>-</sup>HLA-DR<sup>+</sup>); **(F)** CD8+ Memory T<sub>reg</sub> (CD3+CD8+CD4<sup>-</sup>CD25+CD127<sup>lo/-</sup>CD45RA<sup>-</sup>HLA-DR<sup>-</sup>); **(G)** CD3+CD8+CD4<sup>-</sup>CD25+CD127<sup>lo/-</sup>CD45RA+HLA-DR+ double positive T<sub>reg</sub> cells; **(H)** CD4+ naïve T<sub>reg</sub> (CD3+CD4+CD8<sup>-</sup>CD25+CD127<sup>lo/-</sup>CD45RA<sup>-</sup>HLA-DR<sup>-</sup>); **(I)** CD4+ Memory T<sub>reg</sub> (CD3+CD4+CD8<sup>-</sup>CD25+CD127<sup>lo/-</sup>CD45RA<sup>-</sup>HLA-DR<sup>-</sup>); **(J)** CD3+CD4+CD8<sup>-</sup>CD25+CD127<sup>lo/-</sup>CD45RA+HLA-DR+ double positive T<sub>reg</sub> cells. KIM-1+CD4+ activated T<sub>reg</sub> (CD3+CD4+CD8<sup>-</sup>CD25+CD127<sup>lo/-</sup>CD45RA<sup>-</sup>HLA-DR<sup>+</sup>) are not shown as they were present in negligible numbers. Data are shown as mean $\pm$ SD or median (IQR) and tested using Student's T test or Mann Whitney U testing.

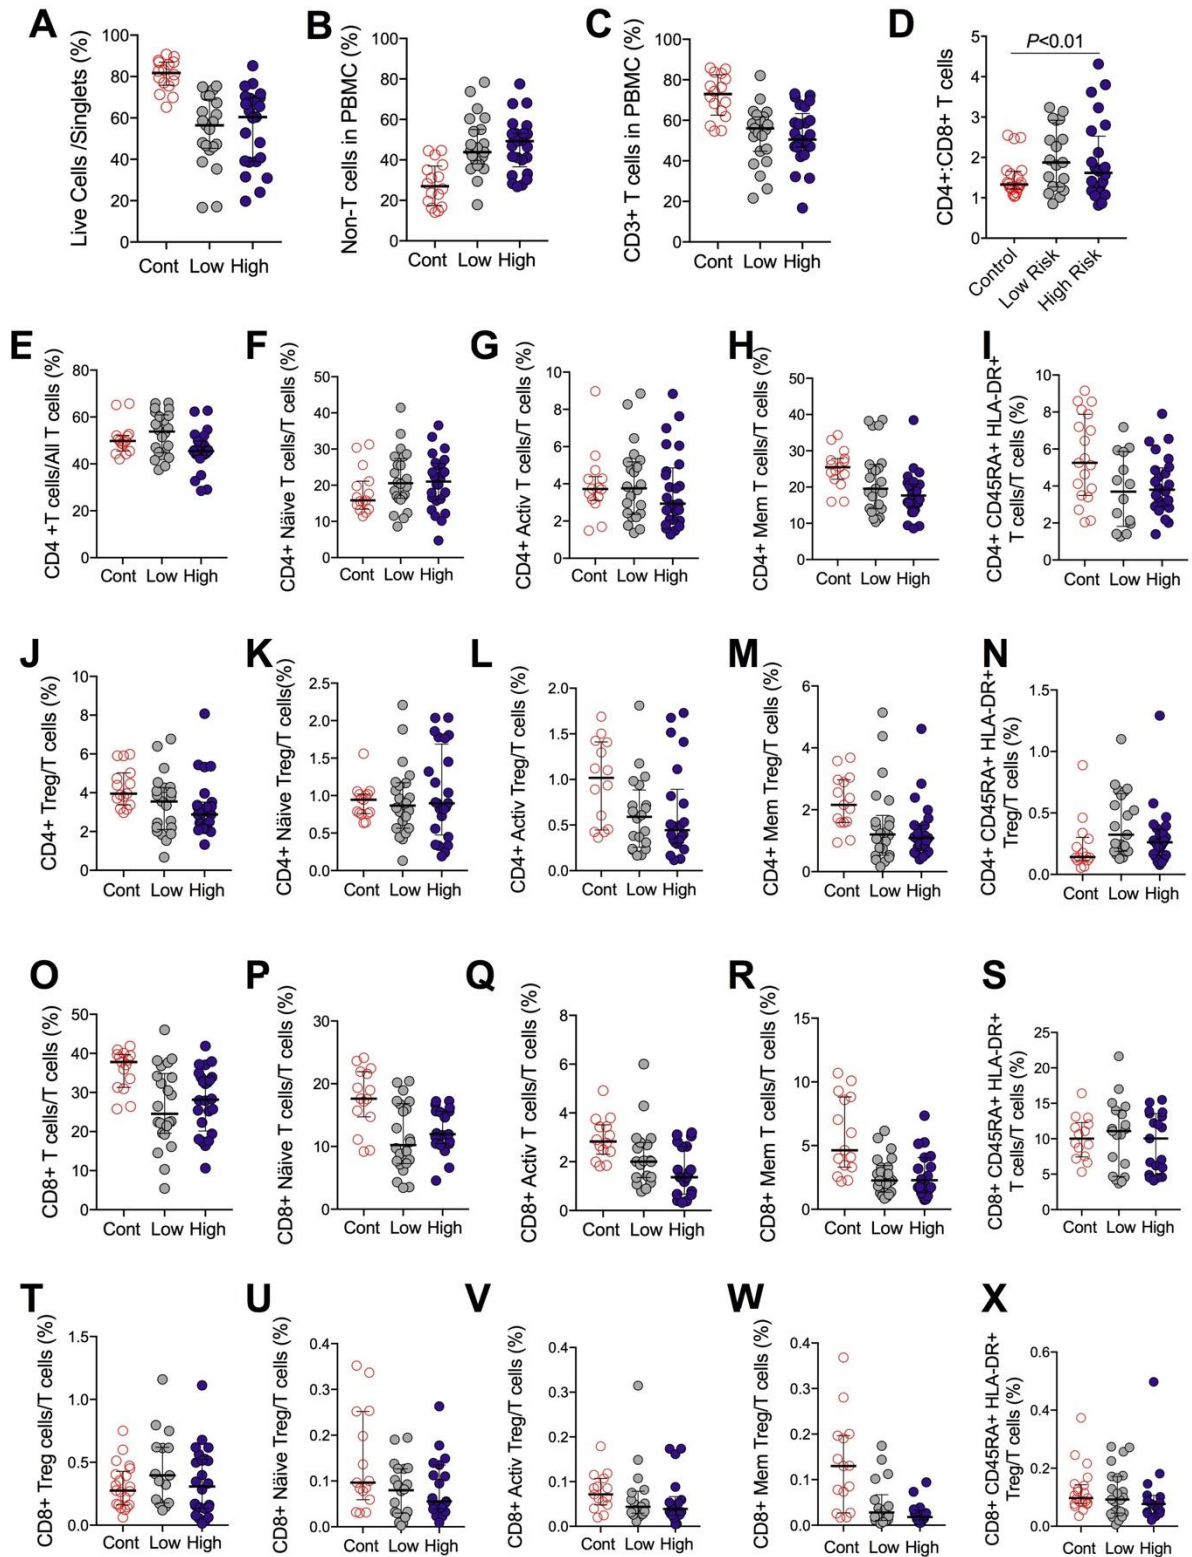

**Suppl. Fig. S9. White blood cell subsets in peripheral blood from youth with type 1 diabetes and varied risk for DKD.** Peripheral leukocytes were obtained from youth ( $20.0 \pm 2.8$  yrs old) with type 1 diabetes with varying risk for DKD (uACR; Low Risk,  $N=33$ ; Medium Risk,  $N=33$ ; High Risk,  $N=34$ ). (A) Live cells were quantified using flow cytometry into (B) Non T cell subsets (CD3<sup>-</sup>); (C) T cells (CD3<sup>+</sup>); (D) CD4+:CD8+ T cell ratio; (E) CD4+ conventional T cells (CD3+CD4+CD8<sup>+</sup>) and F-I the CD4+ conventional (T<sub>conv</sub>) T cell subsets of (F) naïve T<sub>conv</sub> (CD3+CD4+CD8<sup>-</sup>CD45RA+HLA-DR<sup>-</sup>); (G) activated T<sub>conv</sub>

(CD3+CD4+CD8<sup>-</sup>CD45RA<sup>-</sup>HLA-DR<sup>+</sup>); **(H)** memory T<sub>conv</sub> (CD3+CD4+CD8<sup>-</sup>CD45RA<sup>-</sup>HLA-DR<sup>-</sup>) and **(I)** CD3+CD4+CD8<sup>-</sup>CD45RA+HLA-DR+ T<sub>conv</sub>. **(J)** CD4<sup>+</sup> T regulatory (T<sub>reg</sub>) cells (CD3+CD4+CD8<sup>-</sup>CD25+CD127<sup>lo/-</sup>) sorted into **K-N** the CD4<sup>+</sup> T<sub>reg</sub> subsets of **(K)** naïve T<sub>reg</sub> (CD3+CD4+CD8<sup>-</sup>CD25+CD127<sup>lo/-</sup>CD45RA+HLA-DR<sup>-</sup>); **(L)** CD4<sup>+</sup> activated T<sub>reg</sub> (CD3+CD4+CD8<sup>-</sup>CD25+CD127<sup>lo/-</sup>CD45RA-HLA-DR<sup>+</sup>); **(M)** CD4<sup>+</sup> memory T<sub>reg</sub> (CD3+CD4+CD8<sup>-</sup>CD25+CD127<sup>lo/-</sup>CD45RA<sup>-</sup>HLA-DR<sup>-</sup>) and **(N)** CD3+CD4+CD8<sup>-</sup>CD25+CD127<sup>lo/-</sup>CD45RA+HLA-DR+ T<sub>reg</sub>. **(O)** CD8<sup>+</sup> T<sub>conv</sub> cells (CD3+CD8+CD4<sup>-</sup>) sorted into **P-S** the CD8<sup>+</sup> T<sub>conv</sub> subsets of **(P)** naïve T<sub>conv</sub> (CD3+CD8+CD4<sup>-</sup>CD45RA+HLA-DR<sup>-</sup>); **(Q)** activated T<sub>conv</sub> (CD3+CD8+CD4<sup>-</sup>CD45RA<sup>-</sup>HLA-DR<sup>+</sup>); **(R)** memory T<sub>conv</sub> (CD3+CD8+CD4<sup>-</sup>CD45RA<sup>-</sup>HLA-DR<sup>-</sup>) and **(S)** CD3+CD8+CD4<sup>-</sup>CD45RA+HLA-DR+ T<sub>conv</sub>. **(T)** CD8<sup>+</sup> T regulatory (T<sub>reg</sub>) cells (CD3+CD8+CD4<sup>-</sup>CD25+CD127<sup>lo/-</sup>) sorted into **U-X** the CD8<sup>+</sup> T<sub>reg</sub> subsets of **(U)** naïve T<sub>reg</sub> (CD3+CD8+CD4<sup>-</sup>CD25+CD127<sup>lo/-</sup>CD45RA+HLA-DR<sup>-</sup>); **(V)** CD8<sup>+</sup> activated T<sub>reg</sub> (CD3+CD8+CD4<sup>-</sup>CD25+CD127<sup>lo/-</sup>CD45RA-HLA-DR<sup>+</sup>); **(W)** CD8<sup>+</sup> memory T<sub>reg</sub> (CD3+CD8+CD4<sup>-</sup>CD25+CD127<sup>lo/-</sup>CD45RA<sup>-</sup>HLA-DR<sup>-</sup>) and **(X)** CD3+CD8+CD4<sup>-</sup>CD25+CD127<sup>lo/-</sup>CD45RA+HLA-DR+ T<sub>reg</sub>. Data are shown as mean SD or median (IQR) and tested using 1 way ANOVA/Tukey's post-hoc or Kruskal Wallis/Dunn's post-hoc testing.
